# Supplementary material for: Posttraumatic Stress Disorder Is Associated With Worse Endothelial Function Among Veterans
Source: PubMed Central journal article supplement — J Am Heart Assoc. 2016 Mar 23;5(3):e003010. doi: 10.1161/JAHA.115.003010 (PMC4943274; doi:10.1161/jaha.115.003010), 2016-03-23
Supplement: JAH3-5-e003010-s001.pdf [file JAH3-5-e003010-s001.pdf]

**SUPPLEMENTARY MATERIAL**

**Table S1. Characteristics of Patients by Quartiles of PTSD Symptom Check List (PCL)**

| <i>Patient Characteristic</i> <sup>‡</sup>   | <i>PCL Score</i>              |                               |                               |                               | <i>P-value</i> <sup>†</sup> |
|----------------------------------------------|-------------------------------|-------------------------------|-------------------------------|-------------------------------|-----------------------------|
|                                              | <i>17-20</i><br><i>(n=58)</i> | <i>21-30</i><br><i>(n=53)</i> | <i>31-46</i><br><i>(n=51)</i> | <i>47-85</i><br><i>(n=52)</i> |                             |
| <b><i>Demographics</i></b>                   |                               |                               |                               |                               |                             |
| Age, years                                   | 71 ± 8                        | 69 ± 9                        | 68 ± 7                        | 68 ± 6                        | 0.09                        |
| Male Sex                                     | 90%                           | 89%                           | 98%                           | 98%                           | 0.02                        |
| Caucasian                                    | 79%                           | 74%                           | 73%                           | 79%                           | 0.66                        |
| <b><i>Comorbidities and Risk Factors</i></b> |                               |                               |                               |                               |                             |
| History of Smoking                           | 79%                           | 89%                           | 82%                           | 75%                           | 0.48                        |
| Hypertension                                 | 74%                           | 79%                           | 74%                           | 84%                           | 0.34                        |
| Hyperlipidemia                               | 67%                           | 75%                           | 73%                           | 78%                           | 0.21                        |
| Diabetes Mellitus                            | 19%                           | 32%                           | 34%                           | 24%                           | 0.52                        |
| Coronary Artery Disease                      | 26%                           | 30%                           | 22%                           | 29%                           | 0.97                        |
| PHQ-9                                        | 2.2 ± 2.8                     | 4.2 ± 3.0                     | 7.6 ± 5.2                     | 12 ± 5.8                      | <0.0001                     |
| Systolic Blood Pressure (mm Hg)              | 138 ± 21                      | 140 ± 17                      | 137 ± 16                      | 145 ± 20                      | 0.12                        |
| Diastolic Blood Pressure (mm Hg)             | 78 ± 10                       | 80 ± 8                        | 80 ± 11                       | 82 ± 11                       | 0.069                       |
| <b><i>Medications</i></b>                    |                               |                               |                               |                               |                             |
| Aspirin                                      | 57%                           | 59%                           | 62%                           | 74%                           | 0.15                        |
| Ace-inhibitor                                | 34%                           | 40%                           | 28%                           | 18%                           | 0.047                       |
| Beta-Blocker                                 | 36%                           | 43%                           | 40%                           | 27%                           | 0.30                        |
| Statin                                       | 66%                           | 80%                           | 73%                           | 81%                           | 0.23                        |
| <b><i>Laboratory Studies</i></b>             |                               |                               |                               |                               |                             |
| Total Cholesterol (mg/dl)                    | 171 ± 43                      | 168 ± 37                      | 161 ± 42                      | 167 ± 45                      | 0.50                        |
| LDL (mg/dl)                                  | 95 ± 37                       | 90 ± 34                       | 87 ± 34                       | 92 ± 35                       | 0.52                        |
| HDL (mg/dL)                                  | 49 ± 11                       | 50 ± 17                       | 47 ± 11                       | 49 ± 14                       | 0.80                        |
| (log) Triglycerides (mg/dL)                  | 114 ± 20                      | 116 ± 19                      | 109 ± 19                      | 111 ± 19                      | 0.67                        |
| CRP (mg/L)                                   | 2.7 ± 2.5                     | 5.4 ± 6.2                     | 4.7 ± 5.4                     | 3.7 ± 3.6                     | 0.40                        |
| eGFR (ml/min)                                | 73 ± 22                       | 81 ± 24                       | 79 ± 23                       | 79 ± 15                       | 0.23                        |
| HgbA1C (%)                                   | 5.8 ± 0.8                     | 6.1 ± 1.3                     | 5.9 ± 0.6                     | 6.0 ± 1.1                     | 0.46                        |

<sup>‡</sup> Continuous characteristics are summarized by mean (SD) and categorical by percent of quartile having the characteristic.

<sup>†</sup> 1 degree-of-freedom likelihood ratio tests

**Table S2: Flow-mediated brachial artery vasodilation (FMD) by sample quartiles of PTSD Symptom Checklist (PCL) Score**

| <i>Patient Characteristic</i>                            | <i>PCL Score</i>        |                         |                         |                         | <i>P-value</i> <sup>†</sup> |
|----------------------------------------------------------|-------------------------|-------------------------|-------------------------|-------------------------|-----------------------------|
|                                                          | <i>17-20<br/>(n=58)</i> | <i>21-30<br/>(n=53)</i> | <i>31-46<br/>(n=51)</i> | <i>47-85<br/>(n=52)</i> |                             |
| Baseline Diameter (cm)                                   | 0.38 ± 0.06             | 0.39 ± 0.07             | 0.40 ± 0.06             | 0.41 ± 0.06             | 0.03                        |
| Reactive Hyperemia Diameter (cm)                         | 0.41 ± 0.06             | 0.41 ± 0.07             | 0.42 ± 0.06             | 0.43 ± 0.05             | --                          |
| Change from baseline with RH                             | 0.30±0.15               | 0.26±0.12               | 0.25±0.13               | 0.24±0.13               | --                          |
| % Change from baseline ( <i>Brachial FMD</i> )           | 8.0 ± 4.0               | 7.1 ± 3.5               | 6.6 ± 3.7               | 6.1 ± 3.4               | 0.008                       |
| Baseline Velocity (m/s)                                  | 1.5 ± 0.7               | 1.7 ± 0.8               | 1.6 ± 0.8               | 1.4 ± 0.5               | 0.37                        |
| Reactive Hyperemia Velocity (m/s)                        | 8.0 ± 3.0               | 7.6 ± 2.6               | 7.7 ± 2.7               | 8.3 ± 2.6               | --                          |
| Change from baseline with RH (m/s)                       | 6.4 ± 2.8               | 5.9 ± 2.8               | 6.1 ± 2.7               | 6.9 ± 2.6               | 0.38                        |
| Baseline Flow (mL/min)                                   | 106 ± 51                | 124 ± 77                | 121 ± 63                | 112 ± 49                | 0.62                        |
| Reactive Hyperemia Flow (mL/min)                         | 655 ± 310               | 636 ± 292               | 672 ± 318               | 736 ± 261               | --                          |
| Change from baseline with RH (mL/min)                    | 548 ± 282               | 512 ± 262               | 551 ± 295               | 624 ± 252               | 0.13                        |
| Baseline Shear Stress (dynes/cm <sup>2</sup> )           | 12 ± 6.0                | 13 ± 7.5                | 12 ± 6.8                | 10 ± 4.3                | 0.17                        |
| Reactive Hyperemia Shear Stress (dynes/cm <sup>2</sup> ) | 55 ± 22                 | 53 ± 20                 | 52 ± 19                 | 55 ± 18                 | --                          |
| Change from baseline with RH (dynes/cm <sup>2</sup> )    | 43 ± 20                 | 40 ± 21                 | 40 ± 17                 | 45 ± 19                 | 0.70                        |

<sup>†</sup> To avoid inflating the type-1 error rate (false-positive claims), statistical tests (3 degree-of-freedom likelihood ratio tests) examined one measure each of variation at start and at end of vasodilation challenge.
